# Supplementary material for: Comparison of Graphitic Carbon Nitrides Synthetized from Melamine and Melamine-Cyanurate Complex: Characterization and Photocatalytic Decomposition of Ofloxacin and Ampicillin
Source: MDPI journal article supplement (doi:10.3390/ma14081967), 2021-04-14
Supplement: s1 [file s1]

## Supplementary materials

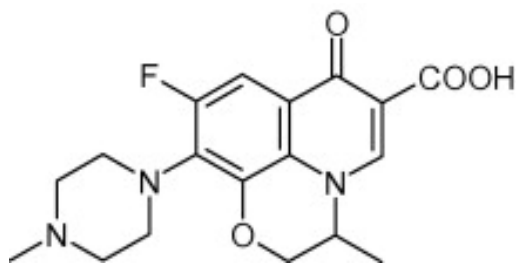

Figure S1. Molecular structure of Ofloxacin.

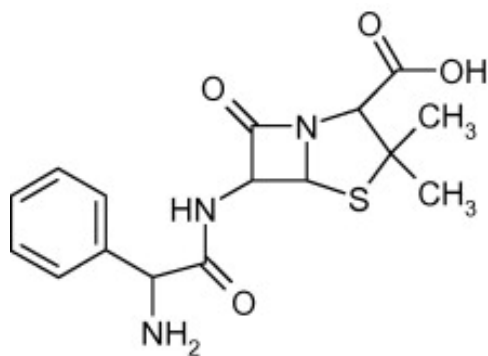

Figure S2. Molecular structure of Ampicillin.
